# 1 **Population Turnover in Remote Oceania Shortly After Initial Settlement**

2

3 Mark Lipson<sup>1,†</sup>, Pontus Skoglund<sup>1,2,†</sup>, Matthew Spriggs<sup>3,4</sup>, Frederique Valentin<sup>5</sup>, Stuart Bedford<sup>4,6</sup>,  
4 Richard Shing<sup>4</sup>, Hallie Buckley<sup>7</sup>, Iarawai Phillip<sup>4</sup>, Graeme K. Ward<sup>6</sup>, Swapan Mallick<sup>1,8,9</sup>, Nadin  
5 Rohland<sup>1</sup>, Nasreen Broomandkhoshbacht<sup>1,8</sup>, Olivia Cheronet<sup>10,11</sup>, Matthew Ferry<sup>1,8</sup>, Thomas K.  
6 Harper<sup>12</sup>, Megan Michel<sup>1,8</sup>, Jonas Oppenheimer<sup>1,8</sup>, Kendra Sirak<sup>11,13</sup>, Kristin Stewardson<sup>1,8</sup>, Kathryn  
7 Auckland<sup>14</sup>, Adrian V.S. Hill<sup>14</sup>, Kathryn Maitland<sup>15</sup>, Stephen J. Oppenheimer<sup>16</sup>, Tom Parks<sup>14</sup>,  
8 Kathryn Robson<sup>17</sup>, Thomas N. Williams<sup>15</sup>, Douglas J. Kennett<sup>12</sup>, Alexander J. Mentzer<sup>14</sup>, Ron  
9 Pinhasi<sup>10,11,\*</sup> and David Reich<sup>1,8,9,18,\*</sup>

10

11 <sup>1</sup> Department of Genetics, Harvard Medical School, Boston, MA 02115, USA

12 <sup>2</sup> The Francis Crick Institute, London NW1 1AT, United Kingdom

13 <sup>3</sup> School of Archaeology and Anthropology, College of Arts and Social Sciences, The Australian  
14 National University, Canberra, ACT 2601, Australia

15 <sup>4</sup> Vanuatu National Museum, Vanuatu Cultural Centre, Port Vila, Vanuatu

16 <sup>5</sup> Maison de l'Archéologie et de l'Ethnologie, CNRS, UMR 7041, 92023 Nanterre, France

17 <sup>6</sup> Department of Archaeology and Natural History, College of Asia-Pacific, The Australian National  
18 University, Canberra, ACT 2601, Australia

19 <sup>7</sup> Department of Anatomy, Otago Global Health Institute, School of Biomedical Sciences, University  
20 of Otago, Dunedin, 9054, New Zealand

21 <sup>8</sup> Howard Hughes Medical Institute, Boston, MA 02115, USA

22 <sup>9</sup> Medical and Population Genetics Program, Broad Institute of MIT and Harvard, Cambridge, MA  
23 02142, USA

24 <sup>10</sup> Department of Anthropology, University of Vienna, Althanstrasse 14, 1090 Vienna, Austria

25 <sup>11</sup> Earth Institute, University College Dublin, Dublin 4, Ireland

26 <sup>12</sup> Department of Anthropology & Institute for Energy and the Environment, The Pennsylvania State  
27 University, University Park, PA 16802, USA

28 <sup>13</sup> Department of Anthropology, Emory University, Atlanta, GA, USA

29 <sup>14</sup> Wellcome Centre for Human Genetics, University of Oxford, Oxford OX3 7BN, UK

30 <sup>15</sup> Department of Paediatrics, Faculty of Medicine, Imperial College, St Mary's Hospital, Norfolk Pl,  
31 Paddington, London W2 1PG, UK

32 <sup>16</sup> School of Anthropology and Museum Ethnography, University of Oxford, Oxford, OX2 6PE, UK

33 <sup>17</sup> MRC Weatherall Institute of Molecular Medicine, University of Oxford, Oxford OX3 9DS, UK

34 <sup>18</sup> Max Planck-Harvard Research Center for the Archaeoscience of the Ancient Mediterranean,  
35 Cambridge, MA 02138, USA

36

37 † Equally contributed

38 \* Co-directed this work

39

40 Correspondence to: Mark Lipson ([mlipson@genetics.med.harvard.edu](mailto:mlipson@genetics.med.harvard.edu)) or David Reich

41 ([reich@genetics.med.harvard.edu](mailto:reich@genetics.med.harvard.edu))

42

43

## 44 **Summary**

45 Ancient DNA analysis of three individuals dated to ~3000 years before present (BP) from Vanuatu  
46 and one ~2600 BP individual from Tonga has revealed that the first inhabitants of Remote Oceania  
47 (“First Remote Oceanians”) were almost entirely of East Asian ancestry, and thus their ancestors  
48 passed New Guinea, the Bismarck Archipelago, and the Solomon Islands with minimal admixture  
49 with the Papuan groups they encountered [1]. However, all present-day populations in Near and  
50 Remote Oceania harbor 25-100% Papuan ancestry, implying that there must have been at least one  
51 later stream of migration eastward from Near Oceania. We generated genome-wide data for 14  
52 ancient individuals from Efate and Epi Islands in Vanuatu ranging from 3,000-150 BP, along with  
53 185 present-day Vanuatu individuals from 18 islands. We show that people of almost entirely  
54 Papuan ancestry had arrived in Vanuatu by 2400 BP, an event that coincided with the end of the  
55 Lapita cultural period, changes in skeletal morphology, and the cessation of long-distance trade  
56 between Near and Remote Oceania [2]. First Remote Oceanian ancestry subsequently increased via  
57 admixture but remains at 10-20% in most islands. Through a fine-grained comparison of ancestry  
58 profiles in Vanuatu and Polynesia with diverse groups in Near Oceania, we find that Papuan  
59 ancestry in Vanuatu is consistent with deriving from the Bismarck Archipelago instead of the  
60 geographically closer Solomon Islands. Papuan ancestry in Polynesia also shows connections to the  
61 ancestry profiles present in the Bismarck Archipelago but is more similar to Tolai from New Britain  
62 and Tutuba from Vanuatu than to the ancient Vanuatu individuals and the great majority of present-  
63 day Vanuatu populations. This suggests a third eastward stream of migration from Near to Remote  
64 Oceania bringing a different type of Papuan ancestry.

65

66 **Keywords:** Near Oceania, Remote Oceania, Pacific Islanders, Lapita, Migration, Ancient DNA

67

## 68 **Results and Discussion**

69

70 We generated genome-wide data for 14 ancient individuals from Central Vanuatu (**Table 1; Table**  
71 **S1**). Of these, 11 individuals are newly reported, and 3 individuals that were previously published  
72 are represented here by higher quality data [1]. We identified and selected cochlear bone sections of  
73 petrous bones and processed them into powder in dedicated clean rooms at University College

74 Dublin [3]. We then shipped the powder to Harvard Medical School, where in a second set of clean  
75 rooms we extracted DNA [4, 5] and created individually barcoded Illumina sequencing libraries,  
76 some of which we treated with the enzyme Uracil-DNA Glycosylase (UDG) to greatly reduce the  
77 characteristic errors associated with degraded ancient DNA [6, 7]. We screened these libraries for  
78 evidence of authentic ancient DNA by enriching for DNA overlapping the mitochondrial genome  
79 [8], sequencing on an Illumina NextSeq500 instrument, and assessing the data based on rates of  
80 cytosine-to-thymine damage in the terminal nucleotide and consistency with the consensus  
81 mitochondrial genome (STAR Methods) [9]. For libraries that were promising after screening, we  
82 enriched for regions targeting approximately 1.24 million single nucleotide polymorphisms (SNPs)  
83 in the human genome and sequenced the enriched products to greater depth (STAR Methods). We  
84 determined sex by examining the ratio of sequences overlapping the Y chromosome and X  
85 chromosome, and for males, we additionally estimated contamination based on the rate of  
86 polymorphism on the haploid X chromosome (STAR Methods; **Table S1**). The data for the 14  
87 individuals passing quality control were derived from a total of 46 Illumina libraries (1-8 per  
88 individual; **Table S2**). We also generated genome-wide SNP genotype data on the Human Origins  
89 array for 185 present-day individuals from Vanuatu who gave informed consent for studies of  
90 genetic variation, with approval from both the University of Oxford and the Vanuatu Cultural  
91 Centre (STAR Methods; **Table S3**).

92

### 93 *Clustering analyses*

94 We performed automated clustering analysis with the ADMIXTURE software [10], using a data set  
95 consisting of the ancient and present-day Vanuatu samples together with other Oceanian, East  
96 Asian, and worldwide populations genotyped on the Human Origins array [1] (**Figure 1; Figure**  
97 **S1**). At  $K = 8$  clusters, four ancestry components were inferred to be widespread in Oceania. Three  
98 correlate (predominantly) to Papuan ancestry, and are maximized in New Guinea (purple in the  
99 ADMIXTURE plot), Mamusi and Baining from New Britain (blue), and Nasioi from Bougainville  
100 in the Solomon Islands (red). The fourth component (green) correlates to First Remote Oceanian  
101 ancestry, and is maximized in the ancient Lapita individuals from Vanuatu and Tonga. Other  
102 Oceanian populations display variable combinations of these components, forming gradients of  
103 ancestry between New Guinea, New Britain and New Ireland in the Bismarck Archipelago, and the  
104 Solomon Islands. The great majority of present-day as well as ancient groups from Vanuatu show  
105 highly similar ratios of the three Papuan ancestry components (although their First Remote

106 Oceanian proportions vary), suggesting that they largely derived their Papuan ancestry from the  
107 same source. Among populations in Near Oceania, the most similar to Vanuatu in terms of the  
108 Papuan ancestry component ratio (purple-to-blue-to-red) are groups from New Britain in the  
109 Bismarck Archipelago with a majority of the blue component and smaller contributions of purple  
110 and red, pointing to an origin from the Bismarck Archipelago (rather than the geographically closer  
111 Solomon Islands) for the Papuan ancestry in Vanuatu. A similar pattern was previously inferred for  
112 the origin of the Papuan ancestry in Santa Cruz to the north of Vanuatu [11] (a result we replicate  
113 here), implying similar sources for both island chains.

114

115 We also carried out a principal component analysis focusing on the geographic variation in Papuan  
116 ancestry (**Figure S2**). The results confirm those from ADMIXTURE, with the primary feature being  
117 a U-shaped cline from top left to top right—encompassing Nakanai (western New Britain), Sulka  
118 and Mengen (eastern New Britain), most of Vanuatu, Tolai, Tutuba, New Ireland, and finally  
119 Bougainville—corresponding closely to a trend of increasing red and decreasing blue components  
120 in ADMIXTURE. The position of the Vanuatu samples in the PCA also supports the hypothesis that  
121 the inhabitants of the region after the initial Lapita settlement derived ancestry ultimately not from  
122 the closer Solomon Islands but from the area of New Britain in the Bismarck Archipelago.

123

#### 124 *Papuan and First Remote Oceanian ancestry proportions*

125 It has been shown that the strongest driver of genetic variation in Oceania today is the widespread  
126 but highly variable admixture between Papuan and First Remote Oceanian ancestry sources, the  
127 former representing original inhabitants of Near Oceania and the latter descendants of the  
128 Austronesian expansion from East and Southeast Asia [1]. From our clustering results, a dramatic  
129 turnover is apparent in Vanuatu between around 3000 and 2400 years ago, with First Remote  
130 Oceanian populations being joined or possibly completely replaced by individuals of (almost)  
131 entirely Papuan ancestry. To provide precise estimates of mixture proportions, we used  $f_4$ -ratio  
132 statistics [12], assuming a topology of (Atayal, (Kankanaey, First Remote Oceanian)) for East  
133 Asian-derived ancestry and (Australian, (New Guinea, Papuan)) for Papuan ancestry (**Figure 1**;  
134 **Table S4**). Taking advantage of our increased coverage compared to the first study of Lapita  
135 samples, we find that the ~3000 BP Lapita individuals likely had a small amount of Papuan-related  
136 ancestry ( $2.4 \pm 0.9\%$ ), although it remains striking that the initial First Remote Oceanian migrants  
137 were only minimally admixed. Given the small proportion, we did not have sufficient statistical

138 power to determine whether this Papuan-related ancestry is derived from the region surrounding  
139 New Guinea or could perhaps have been acquired elsewhere, such as in the Philippines or eastern  
140 Indonesia. Notably, the first post-Lapita sample (2400 BP from Mele-Taplins, Efate) had almost  
141 entirely Papuan ancestry but with a small amount from First Remote Oceanians ( $4.2 \pm 1.1\%$ ). The  
142 more recent ancient individuals are similar in their proportions to present-day populations: 8-12%  
143 First Remote Oceanian ancestry for 1400-200 BP and 20% for 150 BP (Efate), as compared to a  
144 range of 9-38% today (mostly 12-20%; maximized in the Polynesian outlier population of Futuna).  
145 For time points with multiple samples, the individuals' mixture proportions are statistically  
146 indistinguishable, except at 150 BP ( $\sim 14\%$ ,  $21\%$ , and  $26\%$  First Remote Oceanian).

147

#### 148 *Dates of admixture*

149 We estimated dates of admixture based on weighted admixture linkage disequilibrium (LD) [13]  
150 using ALDER [14], with Ami and New Guinea as references (**Figure 2; Table S4**). We obtain  
151 significant evidence for admixture LD in almost all present-day populations and three ancient  
152 population groupings (noting that power is highly sample size-dependent). The date estimates are  
153 mostly 40-100 generations ago, or 1,100-2,800 years ago assuming 28 years per generation [15],  
154 consistent with initial admixture soon after the early settlement of Vanuatu and further mixture  
155 continuing through time (in cases of multiple pulse of admixture, ALDER produces a single average  
156 date). We observe a modest but significant negative correlation between admixture date and First  
157 Remote Oceanian ancestry proportion ( $R^2 = 0.32$  for populations in **Figure 2**, nominal  $p < 0.01$ ), as  
158 would be expected if a subset of populations (e.g., Efate, Emae, Futuna, Makura) received more  
159 recent pulses of gene flow from groups with high proportions of First Remote Oceanian ancestry (a  
160 plausible scenario in light of Polynesian cultural influence [16]). We also obtain a direct admixture  
161 date of  $18 \pm 6$  generations in the past ( $500 \pm 160$  years) for a pair of ancient samples from Vanuatu  
162 radiocarbon dated to  $\sim 1,400$  years ago, consistent with the ALDER dates in the majority of present-  
163 day groups. There has been debate about the timing of admixture between people of East Asian and  
164 Papuan ancestry in Remote Oceania, with methods based on wavelet transformations suggesting  
165 mixing  $>3,000$  BP, prior to the Lapita expansion to Remote Oceania [11, 17], and methods based on  
166 admixture LD suggesting more recent dates, implying that mixture must have occurred following  
167 later streams of gene flow [18]. It was recently argued that the differences may reflect systematic  
168 biases of the methods for dates more than a couple of thousand years old [11], and thus our finding

169 of a definitively post-Lapita date in samples that are within a thousand years of the estimated  
170 admixture date strengthens the evidence for more recent mixture.

171

### 172 *Phylogeny of First Remote Oceanian ancestry*

173 To test whether the First Remote Oceanian ancestry in ancient and present-day groups is more  
174 closely related to Lapita samples from Tonga or Vanuatu, we used a block jackknife to evaluate the  
175 difference between the statistics  $f_4(\text{Test}, \text{Han}; \text{Atayal}, \text{Tonga}_{2600\text{BP}})$  and  $f_4(\text{Test}, \text{Han}; \text{Atayal},$   
176  $\text{Vanuatu}_{3000\text{BP}})$  for Oceanian populations as *Test* (STAR Methods). We found a trend toward  
177 greater allele-sharing with Tonga, with significant results in Polynesian and to a lesser degree  
178 Polynesian outlier populations (**Table S5**). These results show that the First Remote Oceanian  
179 ancestry in Polynesians today is derived from a source that was closer to the sampled Lapita-period  
180 population from Tonga than to the Vanuatu Lapita population. We do not observe significant  
181 differences for present-day populations from Vanuatu, but our statistical power is limited due to the  
182 small proportions of First Remote Oceanian ancestry.

183

### 184 *Phylogeny of Papuan ancestry*

185 We built admixture graphs to explore in more detail the different streams of Papuan ancestry  
186 present in Oceania. We used as reference populations Australia, Kankanaey, Atayal, and Mixe,  
187 together with representatives of major poles of Papuan genetic variation inferred from the  
188 ADMIXTURE analysis: Vanuatu\_Tanna, Mamusi (New Britain), Nasioi (Solomon Islands), New  
189 Guinea, and Tolai (New Britain/New Ireland). To avoid overfitting, we adopted a restricted  
190 framework in which the ancestry in each population was modeled as a combination of the same set  
191 of source lineages, with the exception of the unadmixed New Guinea population. We found that  
192 three Papuan source lineages were necessary in order to obtain a good fit for the model—one  
193 maximized in Mamusi, one maximized in Nasioi, and one closest to New Guinea—showing that the  
194 implied ancestry components from ADMIXTURE (**Figure S1**) are all well-supported in formal  
195 models based on allele-sharing statistics (**Figure S3**). The admixture graph analysis suggests that  
196 the blue (Bismarck Archipelago-majority) and red (Solomon Islands-majority) ADMIXTURE  
197 components represent admixed ancestry: both include First Remote Oceanian ancestry (~20% for  
198 red and ~5% for blue), and the two are additionally admixed with each other, as we could not fit a  
199 Solomon Islands population (e.g., Nasioi) and a Bismarck Archipelago population (e.g., Mamusi or  
200 Baining) simultaneously without admixture from one to the other. In our models, we included

201 Solomon Islands-type ancestry in Mamusi (approximately one-third of its total Papuan ancestry),  
202 although we were unable to distinguish the direction(s) of gene flow. Vanuatu was confidently  
203 inferred to have ancestry from all three Papuan sources ( $Z > 8$  for omitting any source).

204

205 We next asked if we could add Polynesians (Tongan) as a mixture of a component related to one of  
206 the other Oceanian populations along with additional First Remote Oceanian ancestry. Such a  
207 model was successful only in one configuration, with Tongan as a mixture of Tolai-related and First  
208 Remote Oceanian ancestry (all  $f_4$ -statistics fit to within 2.0 standard errors of their observed values  
209 except for one residual,  $f_4(\text{Kankanaey, Tongan; Australian, Vanuatu\_Tanna})$ , at  $Z = 2.7$ ; **Figure 3**  
210 **and Figure S3**). Our choice to include Tolai in the model was guided by the ADMIXTURE  
211 analysis, in which the Papuan ancestry profile in Polynesians appears to match that in Tolai (and  
212 Tutuba, from near Espiritu Santo Island in Vanuatu) more closely than other populations. We note  
213 that the Tolai are known to be descended from relatively recent mixture between groups from New  
214 Ireland and New Britain (resulting from displacement caused by the eruption of the Rabaul caldera  
215 ~1400 BP [19]), so their ancestors cannot represent the true source population of the Papuan  
216 ancestry in Polynesians. However, the similarity of Tolai Papuan ancestry to Polynesians suggests  
217 that the Papuan component in Polynesians could similarly be from a mixture of multiple Near  
218 Oceanian sources. Given that Tolai are intermediate between populations from New Britain and  
219 New Ireland (the latter with high Solomon Islands-related ancestry), Polynesians could plausibly  
220 have acquired New Britain-related ancestry from Vanuatu or Santa Cruz, along with ancestry more  
221 closely related to that in New Ireland or the Solomon Islands via a distinct stream of migration.

222

223 As suggested by their similar mixtures of components in ADMIXTURE, the ancient Vanuatu  
224 individuals are broadly consistent with descent from the same common ancestral population as  
225 present-day groups from Vanuatu. In the admixture graphs, we could fit the ancient sample groups  
226 from 2400-200 BP as sister populations to Vanuatu\_Tanna, albeit with different proportions of First  
227 Remote Oceanian ancestry. The one exception was the 150 BP grouping of individuals from Efate  
228 (with ~20% First Remote Oceanian ancestry), which showed significant un-modeled allele sharing  
229 with Tongan (max residual  $Z = 3.5$ , after accounting for excess First Remote Oceanian ancestry).  
230 Some present-day Vanuatu populations, such as Efate and Makura, show a similar pattern when  
231 added to the model, likely reflecting migration of Polynesians to Vanuatu in the last thousand years  
232 or less.

233

234 *Conclusion*

235 By analyzing a time transect of Vanuatu from initial settlement through the present, combined with  
236 dense geographical sampling of surrounding present-day populations, we document a series of  
237 dramatic genetic shifts associated with consistently high human mobility through a total of at least  
238 four distinct streams of migration and admixture. First, the initial human migration to Vanuatu  
239 involved First Remote Oceanians associated with the Lapita culture. Second, by 2400 BP, these  
240 groups were almost completely displaced in Vanuatu by Papuan-ancestry populations originally  
241 from the Bismarck Archipelago, who remain the source for most of the ancestry of people in  
242 Vanuatu today. Third, in Polynesia, we find evidence for a different Papuan ancestry type that  
243 reflects a distinct migration. And fourth, finally, these streams of ancestry reconnected in parts of  
244 the Vanuatu archipelago, influenced by back-migration from Polynesia. These results highlight the  
245 importance of multiple episodes of migration and mixture in shaping the human diversity of  
246 Oceania.

247

248 **Acknowledgements:** We are grateful to Fiona Petchey and Tomasz Goslar for sharing unpublished  
249 information on previously reported radiocarbon dates generated at the University of Waikato and  
250 the Poznan Accelerator Mass Spectrometry laboratories. The Teouma research was supported by the  
251 Australian Research Council (Discovery Grants DP0880789 and DP1101014 15, M.S. and S.B.),  
252 the National Geographic Society (M.S. and S.B.), the Australia-Pacific Science Foundation (M.S.  
253 and S.B.), the Royal Society of New Zealand Marsden Fund (UOO0917, H.B. and S.B.), and a  
254 University of Otago Research Grant (H.B.). We are grateful to the late Richard Shutler Jr. for access  
255 to his original field notes, and to David Burley for contributing further Shutler archives to the  
256 Vanuatu Cultural Centre which aided in interpretation. Ralph Regenvanu, former Director of the  
257 Vanuatu Cultural Centre, gave ethical guidance on the use of the present-day samples for this  
258 project. A.J.M. was supported by a Wellcome Trust Clinical Research Training Fellowship grant  
259 reference 106289/Z/14/Z. We thank Professors John Clegg, David Weatherall, Donald Bowden and  
260 their colleagues for their work establishing the Oceanic sample collection at the University of  
261 Oxford in the U.K, with support from the Wellcome Trust and Medical Research Council. F.V. was  
262 supported by CNRS-UMR 7041. P.S. was supported by the Swedish Research Council (VR grant  
263 2014-453). Accelerator Mass Spectrometry radiocarbon dating work at Pennsylvania State  
264 University (D.J.K) was supported by the NSF Archaeometry program (BCS-1460369). D.R. was



265 supported by NIH grant GM100233, by NSF HOMINID grant BCS-1032255, and by an Allen  
266 Discovery Center of the Paul Allen Foundation, and is a Howard Hughes Medical Institute  
267 investigator.

268

#### 269 **Author Contributions**

270 R.P. and D.R. supervised the study. M.S., F.V., S.B., R.S., H.B., I.P., G.W., and R.P. provided  
271 ancient samples and assembled archaeological and anthropological information. N.R., N.B., O.C.,  
272 M.F., M.M., J.O., K.Si., and K.St. performed ancient DNA laboratory work. T.K.H. and D.J.K.  
273 carried out and analyzed radiocarbon dating data. K.A., A.H., K.M., S.J.O., T.P., K.R., T.N.W., and  
274 A.J.M. provided data from present-day populations. M.L., P.S., S.M., and D.R. analyzed genetic  
275 data. M.L., P.S., M.S., and D.R. wrote the manuscript.

276

277 **Declaration of Interests:** The authors declare no competing interests.

278 **Table 1. Details of Ancient Vanuatu Samples Analyzed in this Study**

| Sample | Code      | Date                                                                                                         | Population label | Location              | Country | Sex | mtDNA            | Y           | SNPs    |
|--------|-----------|--------------------------------------------------------------------------------------------------------------|------------------|-----------------------|---------|-----|------------------|-------------|---------|
| I1370  | B17.P3    | 1160-830 calBCE (3083±26 BP, Wk-21026, corrected for Marine Reservoir Effect)                                | Vanuatu_3000BP   | Teouma, Efate         | Vanuatu | F   | <u>B4a1a1</u>    |             | 237405  |
| I1369  | B10B.P3   | 1050-800 calBCE (3045±30 BP, Poz-81126, corrected for Marine Reservoir Effect)                               | Vanuatu_3000BP   | Teouma, Efate         | Vanuatu | F   | <u>B4a1a</u>     |             | 271048  |
| I1368  | B30A.P3   | 1040-790 calBCE (2983±32 BP, Wk-22657, corrected for Marine Reservoir Effect)                                | Vanuatu_3000BP   | Teouma, Efate         | Vanuatu | F   | <u>B4a1a</u>     |             | 185282  |
| I5951  | TeoQE     | 1258-1088 calBCE (2955±20, PSUAMS-2411)                                                                      | Vanuatu_3000BP   | Teouma Quarry Edge    | Vanuatu | M   | <u>B4a1a1</u>    |             | 23107   |
| I4451  | TAP1      | 516-369 calBCE (2348±32 BP, Wk-20390)                                                                        | Vanuatu_2400BP   | Mele-Taplins, Efate   | Vanuatu | M   | M28a             | K2b1        | 340152  |
| I4425  | EF3_2_E   | 1652-1950 calCE (200±20 BP, UCIAMS-188795)                                                                   | Vanuatu_150BP    | Ifira, Efate          | Vanuatu | F   | P2               |             | 700783  |
| I4450  | SEPU1     | 1520-1645 calCE (305±15 BP, UCIAMS-188793)                                                                   | Vanuatu_350BP    | Pangpang, Efate       | Vanuatu | F   | P1d2             |             | 735460  |
| I4096  | BURU5B    | 429-595 calCE (1430±20 BP, PSUAMS-1841)                                                                      | Vanuatu_1400BP   | Burumba, Epi Island   | Vanuatu | M   | <u>B4a1a1k</u>   | K2b1        | 888003  |
| I3921  | BURU5D    | 400-700 CE [429-595 calCE (1430±20 BP, PSUAMS-1841) from burial 5skull B; 551-650 CE (1464±30 BP, Wk-25769)] | Vanuatu_1400BP   | Burumba, Epi Island   | Vanuatu | M   | P1d1             | K2b1        | 855305  |
| I5259  | Mang1     | 1307-1430 calCE (559±30 BP, Wk-20030)                                                                        | Vanuatu_600BP    | Mangaliliu            | Vanuatu | F   | P1f              |             | 799098  |
| I4419  | BB1       | 1678-1940 calCE (135±15 BP, UCIAMS-188792)                                                                   | Vanuatu_150BP    | Banana Bay, Efate     | Vanuatu | M   | <u>B4a1</u>      | K2b1        | 763556  |
| I4424  | EF_Pango1 | 1661-1950 calCE (190±15 BP, UCIAMS-188794)                                                                   | Vanuatu_150BP    | Pango Village, Efate  | Vanuatu | M   | <i>R</i>         | M1b         | 780469  |
| I4105  | WAMB1     | 1529-1798 calCE (255±20 BP, PSUAMS-1922)                                                                     | Vanuatu_200BP    | Wambi Bay, Epi Island | Vanuatu | M   | M28a             | <u>O1a2</u> | 1012081 |
| I4106  | WAMB2     | 1645-1950 calCE (225±20 BP, PSUAMS-1923)                                                                     | Vanuatu_200BP    | Wambi Bay, Epi Island | Vanuatu | M   | <u>B4a1a1a11</u> | <u>O1a2</u> | 1020436 |

279 Note: Underlining indicates typical East Asian (First Remote Oceanian) haplogroups, while lack of underlining indicates typical  
 280 Australo-Papuan haplogroups (the italicized mtDNA haplogroup *R* is unclassified). The first three samples listed are previously  
 281 published individuals [1] but with new libraries now added to increase coverage; the other 11 are newly published individuals.

282 **Figure 1. Locations and broad-scale genetic structure of analyzed populations.** (A) Bars  
283 represent proportions of Papuan and First Remote Oceanian (white) ancestry. Purple, red, and blue  
284 and colors match those in **Figure S1** but here correspond to clusters assigned based on the  
285 proximity of populations in the ADMIXTURE results (i.e., overall ratios of Papuan ancestry  
286 components) rather than individual ADMIXTURE components: purple, similar to the ratio  
287 maximized in New Guinea; blue, similar to New Britain; red, similar to Solomon Islands; brown,  
288 mixed between New Britain and Solomon Islands clusters (primarily New Ireland). (B) Map of  
289 Vanuatu with islands labeled from which ancient or present-day data are reported in this study. Map  
290 data are from freely available sources: (A) was plotted in R using the ‘maps’ package with data  
291 from <http://www.naturalearthdata.com/>, and (B) was made with a blank map downloaded from  
292 <http://www.maphill.com/vanuatu/simple-maps/blank-map/no-labels/>.

293

294 **A**

**B**

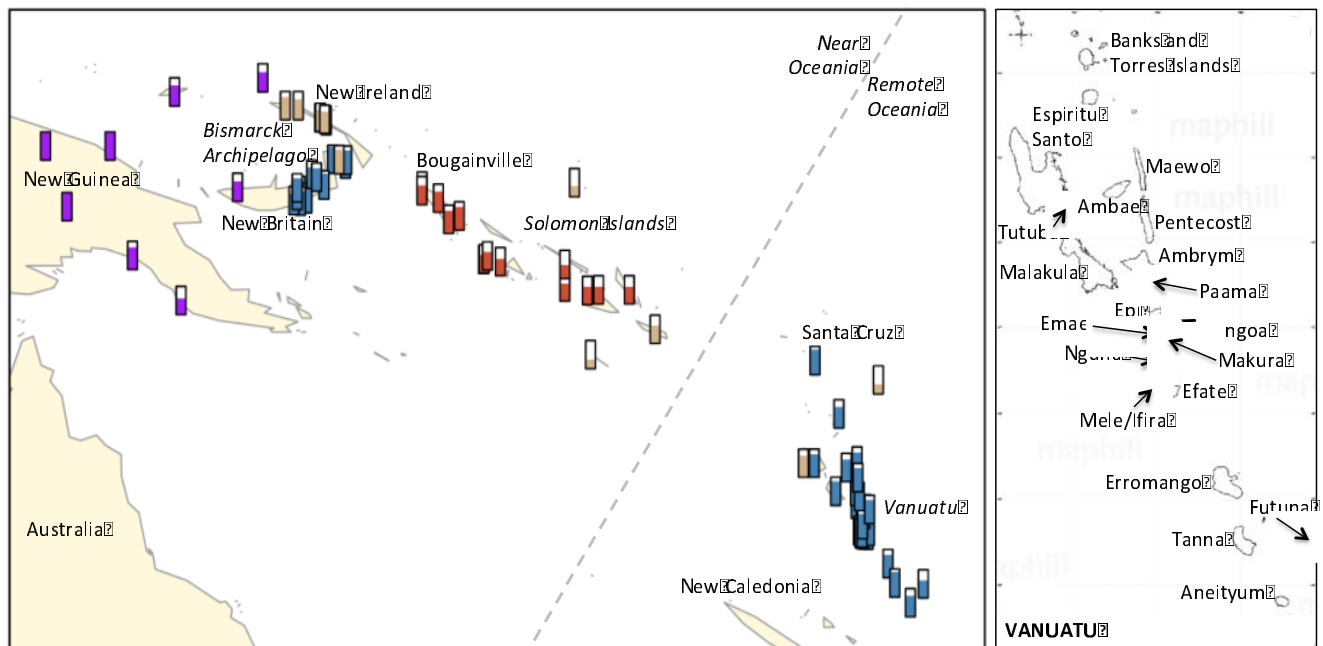

295  
296

297 **Figure 2. Ancestry proportions and dates of admixture in Vanuatu.** Blue points represent the 20  
298 present-day populations with the most confident admixture date estimates (as measured by Z-score  
299 for difference from zero). Colored points represent the ancient population groupings for which we  
300 could obtain dates of admixture (adjusted for sample date by assuming 28 years per generation):  
301 light green, 1400 BP; purple, 200 BP; red, 150 BP. Bars show one standard error in each direction.  
302 See **Table S4** for full results.  
303

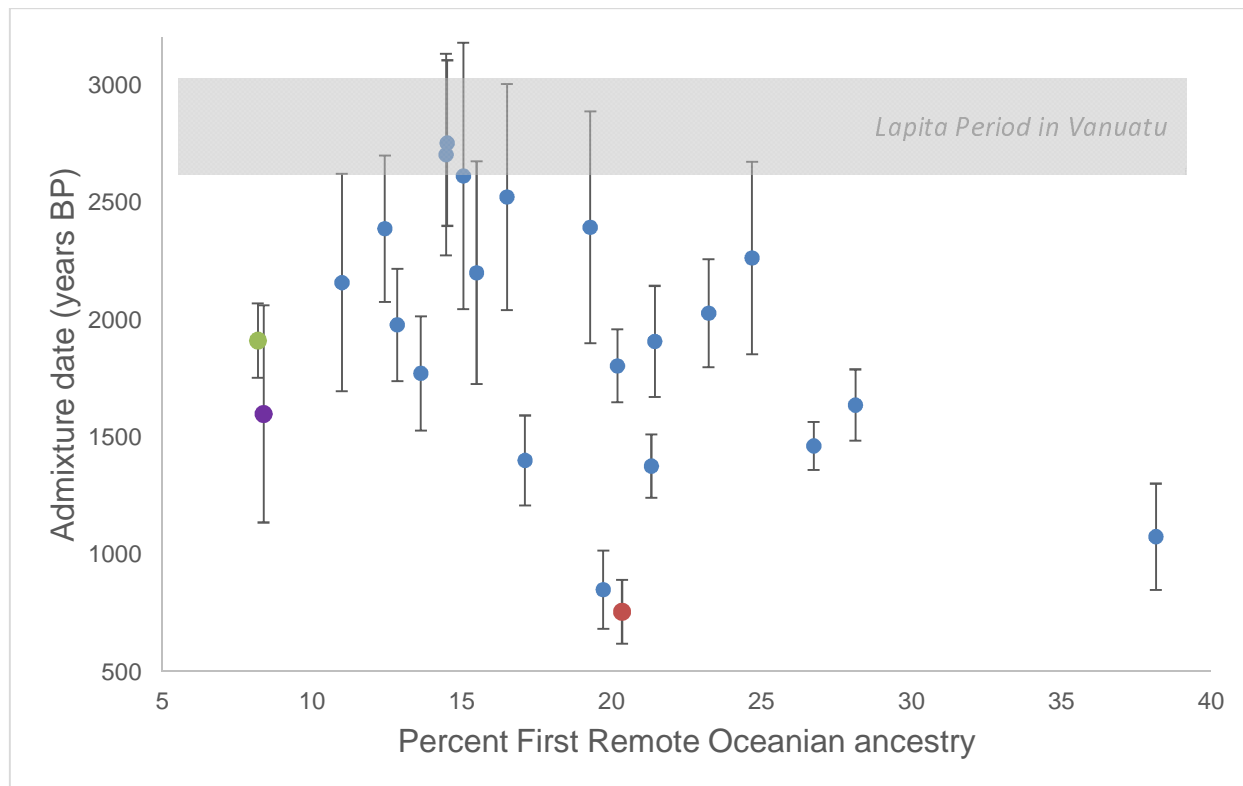

304

305 **Figure 3. Working admixture graph model with diverse present-day Oceanian populations.** Dotted lines denote admixture events.  
 306 For five populations, the proportions of four fitted ancestry sources maximized in First Remote Oceanians (green), Solomon Islands  
 307 (red), Bismarck Archipelago (blue) and New Guinea (purple) are shown. Papuan ancestry is inferred to be highly similar in the Tolai and  
 308 in Tonga, allowing Tonga to be fit as a mixture of a Tolai-related group and additional ancestry from First Remote Oceanians. We note  
 309 that the colors are chosen to be correlated to the components inferred from ADMIXTURE (**Figure S1**), but the ADMIXTURE  
 310 components represent combinations of the admixture graph sources given here, and hence the ratios differ between the two methods. Full  
 311 model parameters can be found in **Figure S3**.

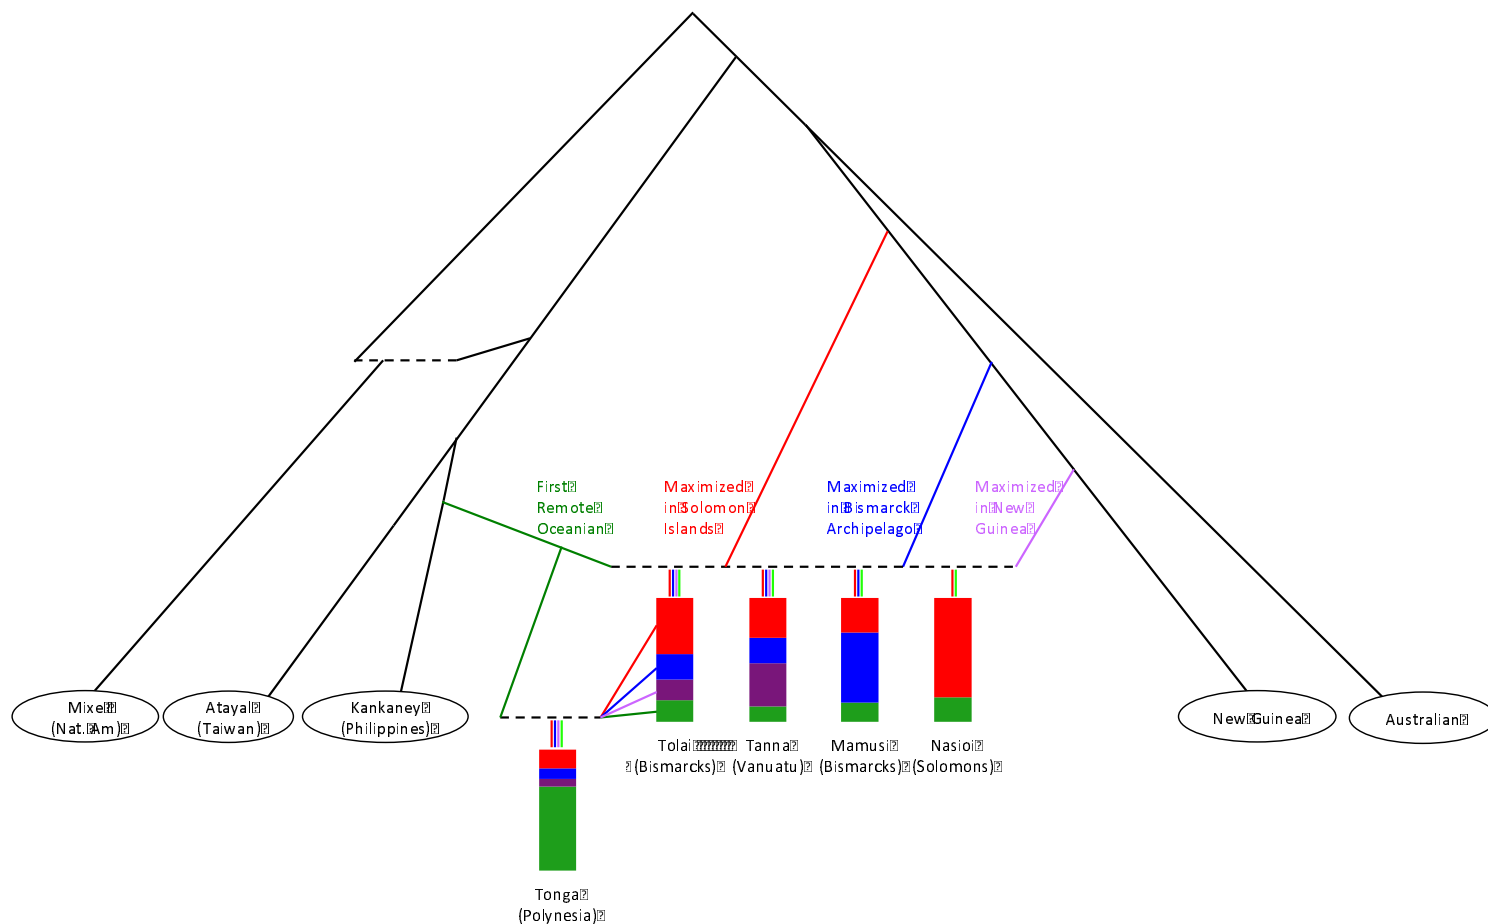

## STAR Methods

### CONTACT FOR REAGENT AND RESOURCE SHARING

Further information and requests for resources and reagents should be direct to and will be fulfilled by the Lead Contact, David Reich ([reich@genetics.med.harvard.edu](mailto:reich@genetics.med.harvard.edu))

### EXPERIMENTAL MODEL AND SUBJECT DETAILS

**Archaeological Context on Ancient Individuals with New Genome-Wide Data.** We newly report data from 14 ancient skeletons. For 3 of these skeletons we are reporting new ancient DNA data increasing the quality of the dataset beyond what was reported on the samples in a previous study [1]. For the 11 remaining samples the data are entirely new:

#### Teouma, Efate Island (~3000 BP) – Lapita Culture (n=4 samples)

The Teouma Lapita culture cemetery and settlement site is discussed in detail in the Supplementary Information to Skoglund et al. 2016 and references [1]. The additional sample I5951 was displaced during quarrying activities before controlled archaeological excavations began at the site in 2004. Given its age it was highly likely to have been from a disturbed burial context of Lapita age and can be legitimately considered with the other Lapita-age skeletons from the site.

- I5951 (TeoQE), Vanuatu\_3000BP

Newly reported sample

Genetic Sex: Male

Radiocarbon Date: 1258-1088 calBCE (2955±20, PSUAMS-2411)

- I1370\_all (B17.P3), Vanuatu\_3000BP

Previously reported in [1]; here we report higher coverage data

Genetic Sex: Female

Radiocarbon Date: 1160-830 calBCE (3083±26 BP, Wk-21026, corrected for Marine Reservoir Effect [1])

- I1369\_all (B10B.P3), Vanuatu\_3000BP

Previously reported in [1]; here we report higher coverage data

Genetic Sex: Female

Radiocarbon Date: 1050-800 calBCE (3045±30 BP, Poz-81126, corrected for Marine Reservoir Effect [1])

- 353 • I1368\_all (TB30A.P3), Vanuatu\_3000BP  
354 Previously reported in [1]; here we report higher coverage data  
355 Genetic Sex: Female  
356 Radiocarbon Date: 1040-790 calBCE (2983±32 BP, Wk-22657, corrected for Marine  
357 Reservoir Effect [1])  
358  
359 Mele-Taplins, Efate Island (~2400 BP) (n=1 sample)  
360 The Mele-Taplins site is described by Valentin and colleagues [20]. The skeleton comes from a  
361 subsurface grave in a rockshelter (Taplins 1) at the base of a cliff, excavated by Graeme Ward of  
362 The Australian National University in 1973-4 and curated at Otago University, Dunedin, New  
363 Zealand. Other burials from the Taplins 2 shelter were of broadly similar age.  
364  
365 • I4451\_all (TAP1), Vanuatu\_2400BP  
366 Newly reported sample  
367 Genetic Sex: Male  
368 Radiocarbon Date: 516-369 calBCE (2348±32 BP, Wk-20390)  
369  
370 Burumba, Epi Island (~1400 BP) (n=2 samples)  
371 The Burumba site is described by Valentin and colleagues [20] and excavated in 2006 by  
372 Frederique Valentin and Jacques Bole. The graves of nine adults were excavated from an open site  
373 at Kalala Plantation 200m from the current beach, dug into sterile sand. Burial 5 was an assemblage  
374 of cranial remains of five individuals placed on a pile of coral slabs and blocks.  
375  
376 • I3921\_all (BURU5D), Vanuatu\_1400BP  
377 Newly reported sample  
378 Genetic Sex: Male  
379 Radiocarbon Date: 429-663 calCE [429-595 calCE (1530±20 BP, PSUAMS-1841), 619-  
380 663 calCE (1395±15, PSUAMS-2428)]  
381  
382 • I4096\_all (BURU5B), Vanuatu\_1400BP  
383 Newly reported sample  
384 Genetic Sex: Male  
385 Radiocarbon Date: 545-650 calCE [551-650 calCE (1464±30 BP, Wk-25769), 545-610  
386 calCE (1490±15 BP, PSUAMS-2460)]  
387  
388 Mangaliliu, Efate Island (~600 BP) (n=1 sample)  
389 The burial was excavated from a test pit in Mangaliliu village by Richard Shing in 2002 and  
390 published in detail by Valentin and colleagues [21]. The originally reported age of the burial was  
391 reassessed after direct dating of the skeleton [20].  
392  
393 • I5259 (burial 1, Mang1), Vanuatu\_600BP, Mangaliliu (Efate Island)  
394 Newly reported sample  
395 Genetic Sex: Female

396 Radiocarbon Date: 1307-1430 calCE (559±30 BP, Wk-20030)

397

398 Pangpang, Efate Island (~350 BP) (n=1 sample)

399 This burial, in a flexed position, was excavated by Richard Shing and Iarawai Philip during  
400 archaeological impact assessment related to the Efate Ring Road construction, between the villages  
401 of Pangpang and Forari. The body was adorned with ornaments composed of numerous tiny Conus  
402 shell and shark vertebrae beads and a large pearl shell pendant. This range of ornaments has been  
403 recorded in burial contexts of the last 400 years, prior to and during the initial phases of European  
404 contact (unpublished field notes, Vanuatu National Museum).

405

406 • I4450 (SEPU1, Sepulture 1), Vanuatu\_350BP

407 Newly reported sample

408 Genetic Sex: Female

409 Radiocarbon Date: 1520-1645 calCE (305±15 BP, UCIAMS-188793)

410

411 Wam Bay, Epi Island (~200 BP) (n=2 samples)

412 The site appears to have been a largely Mission period, late 19<sup>th</sup> to early 20<sup>th</sup> century, cemetery of  
413 which three burials were exposed and was in proximity to a combustion feature associated with the  
414 making of lime-plaster for construction, a European introduced practice. The date of these burials  
415 may need to be further calibrated in the light of dietary analysis and could be younger than indicated  
416 by current calibration of the bone dates. The site was excavated by Frederique Valentin and  
417 Matthew Spriggs in 2006 (unpublished field notes, Vanuatu National Museum).

418

419 • I4105\_all (WAMB1), Vanuatu\_200BP

420 Newly reported sample

421 Genetic Sex: Male

422 Radiocarbon Date: 1529-1798 calCE (255±20 BP, PSUAMS-1922)

423

424 • I4106\_all (WAMB2), Vanuatu\_200BP

425 Newly reported sample

426 Genetic Sex: Male

427 Radiocarbon Date: 1645-1950 calCE (225±20 BP, PSUAMS-1923)

428

429 Ifira, Efate Island (Historical Period) (n=1 sample)

430 This tightly flexed burial from a feature containing skeletal remains of two individuals was  
431 excavated by Mary Elizabeth and Richard Shutler, Jr, in June 1964 on the small island of Ifira in  
432 Vila Harbor, Port Vila, during a test pit survey of the island. It is briefly mentioned in Shutler and  
433 Shutler [22]. Unpublished field notes relating to the excavation are held in the files of the Vanuatu  
434 National Museum. Ifira is notable as one of the Vanuatu Polynesian Outlier islands and this burial  
435 would date to the period of Polynesian cultural influence.

436

437 • I4425 (EF3\_2\_E, Pit 2; Loc E), Vanuatu\_150BP



438 Newly reported sample  
439 Genetic Sex: Female  
440 Radiocarbon Date: 1652-1950 calCE (200±20 BP, UCIAMS-188795)

441  
442 Pango Village, Efate Island (Historical Period) (n=1 sample)

443 This is one of two individuals excavated by Mary Elizabeth and Richard Shutler, Jr, in June 1964 on  
444 the Pango Peninsula opposite the small island of Ifira in Vila Harbour, Port Vila. Unpublished field  
445 notes relating to the excavation are held in the files of the Vanuatu National Museum, but little  
446 detail is available.

447  
448 • I4424 (EF\_Pango1), Vanuatu\_150BP  
449 Newly reported sample  
450 Genetic Sex: Male  
451 Radiocarbon Date: 1661-1950 calCE (190±15 BP, UCIAMS-188794)

452  
453 Banana Bay, Efate Island (Historical Period) (n=1 sample)

454 The burial was excavated by Richard Shing and Iarawai Philip during archaeological impact  
455 assessment related to the Efate Ring Road construction in the Banana Bay area, southeast Efate. The  
456 body, lying on the back, was adorned with ornaments including numerous tiny Conus shell beads  
457 and a few European glass beads (unpublished field notes, Vanuatu National Museum).

458  
459 • I4419 (BB1, Burial 1), Vanuatu\_150BP, Banana Bay (Efate Island)  
460 Newly reported sample  
461 Genetic Sex: Male  
462 Radiocarbon Date: 1678-1940 calCE (135±15 BP, UCIAMS-188792)

463  
464 **Data Collection Strategy for Newly Reported Data from Present-Day Vanuatu.** We genotyped  
465 185 present-day individuals from 32 populations from Vanuatu spanning 18 islands. All individuals  
466 gave informed verbal consent for studies of population history and human health, especially anemia,  
467 consistent with the standards prevailing at the time the data were collected. Samples of whole blood  
468 were collected as part of a range of research projects undertaken from the late 1970s in  
469 collaborations between multiple sites and institutions in Vanuatu and the University of Oxford  
470 investigating population differences at the genetic level. In accordance with participant consent,  
471 DNA was extracted, anonymized, and stored in batches analyzable only by geographic location of  
472 participant origin. Use of the samples for genome-wide analyses including studies of population  
473 history was reviewed by the Oxford Tropical Research Ethics Community at the University of  
474 Oxford and formally approved in a letter dated July 2 2014 (OXTREC Reference: 537-14). The use  
475 of the samples for genetic analysis was also approved by the Vanuatu Cultural Centre in a formal  
476 letter dated May 30, 2017.

477  
478 **METHOD DETAILS**

479

480 **Ancient DNA laboratory work.** In a dedicated clean room at University College Dublin, we used a  
481 dental sandblaster to separate cochlear sections from petrous bones. We milled these samples into  
482 fine powder, and shipped them to Harvard Medical School.

483  
484 At Harvard Medical School, we extracted DNA following a previously published protocol [4], with  
485 two modifications. First, we replaced the combination of a funnel and a MinElute column with  
486 Roche columns [5]. Second, we eluted two times in 45µl, obtaining 90µl of extract for each sample.  
487

488 We prepared libraries from the extracts using a double-stranded protocol, affixing 7-base-pair  
489 sequences to either end to allow multiplexing of the libraries and to prevent contamination from  
490 affecting the samples after barcodes were added. We prepared some of the libraries in the presence  
491 of the enzyme UDG to remove characteristic damage associated with ancient DNA (**Table S2**) [6].  
492

493 We enriched the libraries in solution for sequences overlapping the mitochondrial genome [8] as  
494 well as for 3000 nuclear positions, and sequenced on an Illumina NextSeq500 instrument for  
495 2x76cycles + 2x7 cycles after adding a pair of unique 7-base-pair indices. For libraries that were  
496 promising after screening, we next enriched for sequences overlapping approximately 1.24 million  
497 SNPs [9, 23-25]. We added unique 7-base-pair index combinations to each enriched library, and  
498 sequenced on a multiplexed pool of samples on a lane of an Illumina NextSeq500 instrument for  
499 2x76cycles + 2x7cycles. We iteratively sequenced more sequences from each sample until the  
500 number of new SNPs covered per additional sequences generated was less than about 1 in 100.  
501

502 For samples for which we wished to obtain more coverage, we prepared additional libraries from  
503 existing extract or new extract, up to 8 libraries for some samples. We pooled data from all libraries  
504 for further analysis.  
505

506 **Bioinformatic processing.** We demultiplexed reads into libraries based on their two indices and  
507 two barcodes, allowing no more than one mismatch to the total of four expected 7 base pair  
508 sequences. We merged sequences requiring at least 15 base pairs of overlap using *SeqPrep*  
509 ([github.com/jstjohn/SeqPrep](https://github.com/jstjohn/SeqPrep)).  
510

511 We aligned merged sequences to the mitochondrial RSRS genome [26] (for mitochondrial DNA  
512 analyses) and to the hg19 reference (for whole genome analyses). For alignment we used the single-  
513 ended aligner “samse” from BWA with default parameters (version 0.6.1) [27]. For samples which  
514 are non-UDG treated (and therefore may have higher mismatch rates compared to the reference  
515 genome), we used more relaxed alignment parameters, “-n 0.01 -o 2 -l 16500”. This setting disables  
516 seeding, allowing for less conservative alignments, helping to align damaged reads.  
517

518 **Haplogroup calling strategy on mitochondrial DNA data.** We determined haplogroups using  
519 Haplogrep2, which provides a reliability score for assigned haplogroups [28]. We ran Haplogrep2 in  
520 three configurations and picked the best rank score to represent the haplogroup for that individual.

521 (a) We restricted sequences to those with characteristic patterns of ancient DNA damage in their  
522 terminal nucleotides, which removes contamination. To do this, we used the PMDtools software  
523 [29] requiring a minimum score of  $\text{pmdscore}=3$ . We trimmed the sequences obtained in this way by  
524 5 base pairs on either side to remove nucleotides likely to be deaminated prior to running  
525 Haplogrep2. (b) As a second approach, we trimmed sequences by 5 base pairs on either side to  
526 eliminate characteristic ancient DNA damage and fed these sequences to Haplogrep2 without  
527 damage restriction. (c) Finally, we applied no trimming and made a haplogroup call. We manually  
528 made two exceptions to the rule of always picking the best ranking call. For S4106.E1.L1, (a) and  
529 (c) gave similar ranking scores and we selected B4a1a1a11 from method (a) based on consistency  
530 with calls from two other libraries from the same sample. For S4096.E1.L2, we selected B4a1a1k  
531 manually from method (a) despite a marginally lower rank score than method (c).

532  
533

## 534 **QUANTIFICATION AND STATISTICAL ANALYSIS**

535

### 536 **Population genetic analyses**

537

538 All analyses were based on the set of 593,124 autosomal Human Origins SNPs, except for  
539 ADMIXTURE, which was performed with all 597,573 Human Origins SNPs. Principal component  
540 analysis was carried out using the “lsqproject” and “autoshrink” options in smartpca [30, 31].  
541 ADMIXTURE [10] clustering analysis was performed using default parameters, with the cluster  
542 components (K) ranging from  $K=2$  to  $K=8$ .  $f$ -statistics were computed in ADMIXTOOLS [32],  
543 using the qp4diff program for differences between Lapita  $f_4$ -statistics (“allsnps” mode), with  
544 standard errors obtained by block jackknife.

545

### 546 **Admixture graph fitting**

547

548 We constructed admixture graphs using the qpGraph utility in ADMIXTOOLS [32]. Mixe’s  
549 position as an outgroup relative to the other populations (in an unrooted sense) means that its  
550 eastern and western Eurasian ancestry components can be collapsed into a single lineage with no  
551 change in the model. Similarly, we can omit explicit inclusion of Denisovan admixture because of  
552 the symmetry of such ancestry in the right-hand clade of the model (as displayed in **Figure S3**).

553

554

## 555 **DATASET AND SOFTWARE AVAILABILITY**

556

557 Raw sequences from the 14 individuals are available from the European Nucleotide Archive at  
558 accession number PRJEB24938. Genotypes are available at <https://reich.hms.harvard.edu/datasets>.  
559 To access data for the newly genotyped present-day individuals from Vanuatu, researchers should  
560 send a signed letter to D.R. containing the following text: “(a) I will not distribute the data outside  
561 my collaboration; (b) I will not post the data publicly; (c) I will make no attempt to connect the

562 genetic data to personal identifiers for the samples; (d) I will use the data only for studies of  
 563 population history; (e) I will not use the data for any selection studies; (f) I will not use the data for  
 564 medical or disease-related analyses; (g) I will not use the data for commercial purposes.”

565

566 **KEY RESOURCES TABLE**

567

| REAGENT or RESOURCE                                                   | SOURCE                   | IDENTIFIER     |
|-----------------------------------------------------------------------|--------------------------|----------------|
| <b>Chemicals, Peptides, and Recombinant Proteins</b>                  |                          |                |
| Pfu Turbo Cx Hotstart DNA Polymerase                                  | Agilent Technologies     | 600412         |
| Herculase II Fusion DNA Polymerase                                    | Agilent Technologies     | 600679         |
| 2x HI-RPM hybridization buffer                                        | Agilent Technologies     | 5190-0403      |
| 0.5 M EDTA pH 8.0                                                     | BioExpress               | E177           |
| Sera-Mag™ Magnetic Speed-beads™ Carboxylate-Modified (1µm, 3EDAC/PA5) | GE LifeScience           | 65152105050250 |
| USER enzyme                                                           | New England Biolabs      | M5505          |
| UGI                                                                   | New England Biolabs      | M0281          |
| Bst DNA Polymerase2.0, large frag.                                    | New England Biolabs      | M0537          |
| PE buffer concentrate                                                 | Qiagen                   | 19065          |
| Proteinase K                                                          | Sigma Aldrich            | P6556          |
| Guanidine hydrochloride                                               | Sigma Aldrich            | G3272          |
| 3M Sodium Acetate (pH 5.2)                                            | Sigma Aldrich            | S7899          |
| Water                                                                 | Sigma Aldrich            | W4502          |
| Tween-20                                                              | Sigma Aldrich            | P9416          |
| Isopropanol                                                           | Sigma Aldrich            | 650447         |
| Ethanol                                                               | Sigma Aldrich            | E7023          |
| 5M NaCl                                                               | Sigma Aldrich            | S5150          |
| 1M NaOH                                                               | Sigma Aldrich            | 71463          |
| 20% SDS                                                               | Sigma Aldrich            | 05030          |
| PEG-8000                                                              | Sigma Aldrich            | 89510          |
| 1 M Tris-HCl pH 8.0                                                   | Sigma Aldrich            | AM9856         |
| dNTP Mix                                                              | Thermo Fisher Scientific | R1121          |
| ATP                                                                   | Thermo Fisher Scientific | R0441          |
| 10x Buffer Tango                                                      | Thermo Fisher Scientific | BY5            |
| T4 Polynucleotide Kinase                                              | Thermo Fisher Scientific | EK0032         |
| T4 DNA Polymerase                                                     | Thermo Fisher Scientific | EP0062         |
| T4 DNA Ligase                                                         | Thermo Fisher Scientific | EL0011         |
| Maxima SYBR Green kit                                                 | Thermo Fisher Scientific | K0251          |
| 50x Denhardt's solution                                               | Thermo Fisher Scientific | 750018         |
| SSC Buffer (20x)                                                      | Thermo Fisher Scientific | AM9770         |
| GeneAmp 10x PCR Gold Buffer                                           | Thermo Fisher Scientific | 4379874        |
| Dynabeads MyOne Streptavidin T1                                       | Thermo Fisher Scientific | 65602          |
| Salmon sperm DNA                                                      | Thermo Fisher Scientific | 15632-011      |
| Human Cot-I DNA                                                       | Thermo Fisher Scientific | 15279011       |
| <b>Critical Commercial Assays</b>                                     |                          |                |
| High Pure Extender from Viral Nucleic Acid Large Volume Kit           | Roche                    | 05114403001    |
| MinElute PCR Purification Kit                                         | Qiagen                   | 28006          |
| NextSeq® 500/550 High Output Kit v2 (150 cycles)                      | Illumina                 | FC-404-2002    |

| Deposited Data          |                            |                                                                                                                                             |
|-------------------------|----------------------------|---------------------------------------------------------------------------------------------------------------------------------------------|
| Raw and analyzed data   | This paper                 | ENA: PRJEB24938                                                                                                                             |
| Software and Algorithms |                            |                                                                                                                                             |
| Samtools                | Li et al., 2009            | <a href="http://samtools.sourceforge.net/">http://samtools.sourceforge.net/</a>                                                             |
| BWA                     | Li & Durbin 2008           |                                                                                                                                             |
| ADMIXTOOLS              | Patterson et al. 2012      | <a href="https://github.com/DReichLab/AdmixTools">https://github.com/DReichLab/AdmixTools</a>                                               |
| SeqPrep                 |                            | <a href="https://github.com/jstjohn/SeqPrep">https://github.com/jstjohn/SeqPrep</a>                                                         |
| bamrmdup                |                            | <a href="https://github.com/udo-stenzel/biohazard">https://github.com/udo-stenzel/biohazard</a>                                             |
| smartpca                | Patterson et al. 2006      | <a href="https://www.hsph.harvard.edu/alkes-price/software/">https://www.hsph.harvard.edu/alkes-price/software/</a>                         |
| ADMIXTURE               | Alexander et al. 2009      | <a href="https://www.genetics.ucla.edu/software/admixture/download.html">https://www.genetics.ucla.edu/software/admixture/download.html</a> |
| PMDtools                | Skoglund et al. 2014       | <a href="https://github.com/pontusssk/PMDtools">https://github.com/pontusssk/PMDtools</a>                                                   |
| Haplogrep 2             | Weissensteiner et al. 2016 | <a href="http://haplogrep.uibk.ac.at/">http://haplogrep.uibk.ac.at/</a>                                                                     |
| Yfitter                 | Jostins et al. 2016        | <a href="https://sourceforge.net/projects/yfitter/">https://sourceforge.net/projects/yfitter/</a>                                           |
| ALDER                   | Loh et al. 2013            | <a href="http://cb.csail.mit.edu/cb/alder/">http://cb.csail.mit.edu/cb/alder/</a>                                                           |

568  
569

570 **Figure S2. Principal component analysis of Oceanian populations.** We computed axes using  
571 present-day populations with 17-25% First Remote Oceanian ancestry and projected ancient  
572 samples. For samples with a combination of partial-UDG-treated and non-UDG libraries, the  
573 combined data (“\_all”) are very similar to the UDG-only data, which enhances our confidence in  
574 the results.

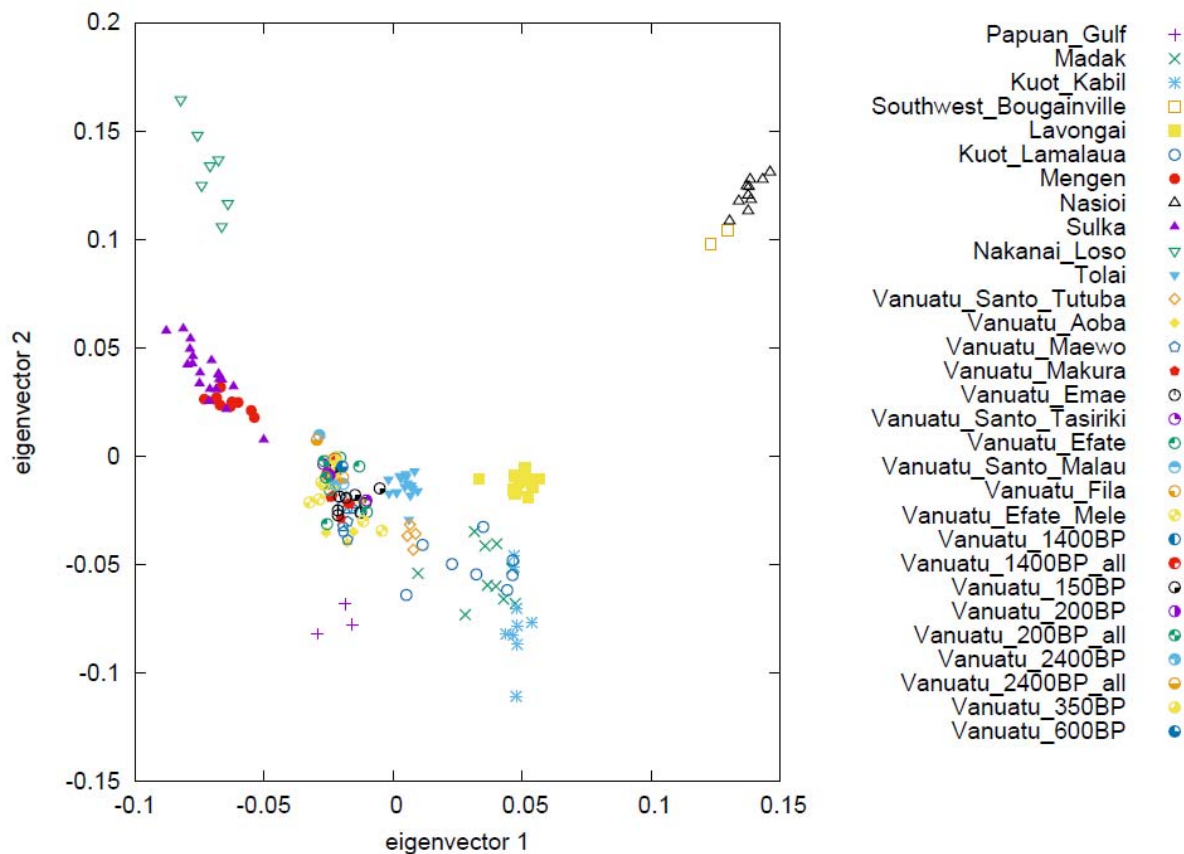

575  
576

577 **Figure S3. Admixture graph model with inferred parameters.** The model shown is the same as  
 578 in **Figure 3** but with an alternative visualization. Branch lengths are given in units of  $f_2$  genetic drift  
 579 distance times 1000, and admixture proportions are indicated along corresponding dotted lines. Red,  
 580 Solomon Islands majority source; blue, Bismarck Archipelago majority source; purple, New  
 581 Guinea-related source; green, First Remote Oceanian; brown, mixed ancestry. The order of  
 582 admixture events specified is arbitrary.

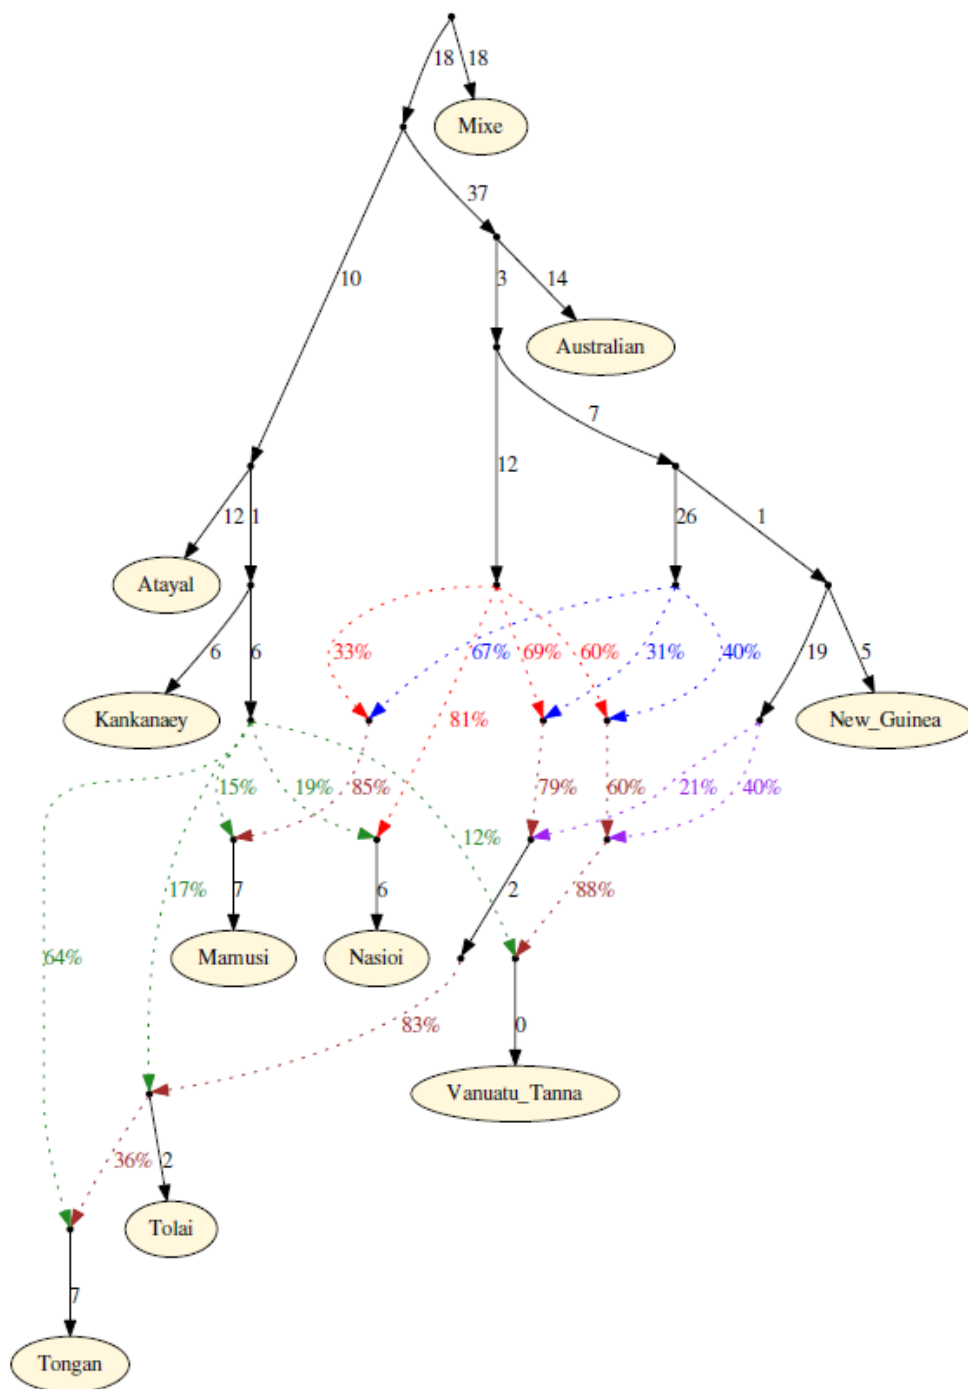

583  
 584  
 585

## 586 References

587

- 588 1. Skoglund, P., Posth, C., Sirak, K., Spriggs, M., Valentin, F., Bedford, S., Clark, G.R.,  
589 Reepmeyer, C., Petchey, F., Fernandes, D., et al. (2016). Genomic insights into the  
590 peopling of the Southwest Pacific. *Nature* 538, 510-513.
- 591 2. Valentin, F., Detroit, F., Spriggs, M.J., and Bedford, S. (2016). Early Lapita skeletons from  
592 Vanuatu show Polynesian craniofacial shape: Implications for Remote Oceanic  
593 settlement and Lapita origins. *Proceedings of the National Academy of Sciences of the*  
594 *United States of America* 113, 292-297.
- 595 3. Pinhasi, R., Fernandes, D., Sirak, K., Novak, M., Connell, S., Alpaslan-Roodenberg, S.,  
596 Gerritsen, F., Moiseyev, V., Gromov, A., Raczky, P., et al. (2015). Optimal Ancient DNA  
597 Yields from the Inner Ear Part of the Human Petrous Bone. *PloS one* 10, e0129102.
- 598 4. Dabney, J., Knapp, M., Glocke, I., Gansauge, M.T., Weihmann, A., Nickel, B., Valdiosera, C.,  
599 Garcia, N., Paabo, S., Arsuaga, J.L., et al. (2013). Complete mitochondrial genome  
600 sequence of a Middle Pleistocene cave bear reconstructed from ultrashort DNA  
601 fragments. *Proceedings of the National Academy of Sciences of the United States of*  
602 *America* 110, 15758-15763.
- 603 5. Korlevic, P., Gerber, T., Gansauge, M.T., Hajdinjak, M., Nagel, S., Aximu-Petri, A., and  
604 Meyer, M. (2015). Reducing microbial and human contamination in DNA extractions  
605 from ancient bones and teeth. *BioTechniques* 59, 87-93.
- 606 6. Rohland, N., Harney, E., Mallick, S., Nordenfelt, S., and Reich, D. (2015). Partial uracil-  
607 DNA-glycosylase treatment for screening of ancient DNA. *Philosophical transactions of*  
608 *the Royal Society of London. Series B, Biological sciences* 370, 20130624.
- 609 7. Briggs, A.W., Stenzel, U., Meyer, M., Krause, J., Kircher, M., and Paabo, S. (2010).  
610 Removal of deaminated cytosines and detection of in vivo methylation in ancient DNA.  
611 *Nucleic acids research* 38, e87.
- 612 8. Maricic, T., Whitten, M., and Paabo, S. (2010). Multiplexed DNA sequence capture of  
613 mitochondrial genomes using PCR products. *PloS one* 5, e14004.
- 614 9. Fu, Q., Meyer, M., Gao, X., Stenzel, U., Burbano, H.A., Kelso, J., and Paabo, S. (2013). DNA  
615 analysis of an early modern human from Tianyuan Cave, China. *Proceedings of the*  
616 *National Academy of Sciences of the United States of America* 110, 2223-2227.
- 617 10. Alexander, D.H., Novembre, J., and Lange, K. (2009). Fast model-based estimation of  
618 ancestry in unrelated individuals. *Genome research* 19, 1655-1664.
- 619 11. Pugach, I., Duggan, A.T., Merriwether, D.A., Friedlaender, F.R., Friedlaender, J.S., and  
620 Stoneking, M. (2018). The gateway from Near into Remote Oceania: new insights from  
621 genome-wide data. *Molecular biology and evolution*.
- 622 12. Reich, D., Thangaraj, K., Patterson, N., Price, A.L., and Singh, L. (2009). Reconstructing  
623 Indian population history. *Nature* 461, 489-494.
- 624 13. Moorjani, P., Patterson, N., Hirschhorn, J.N., Keinan, A., Hao, L., Atzmon, G., Burns, E.,  
625 Ostrer, H., Price, A.L., and Reich, D. (2011). The history of African gene flow into  
626 Southern Europeans, Levantines, and Jews. *PLoS genetics* 7, e1001373.
- 627 14. Loh, P.-R., Lipson, M., Patterson, N., Moorjani, P., Pickrell, J.K., Reich, D., and Berger, B.  
628 (2012). Inference of admixture parameters in human populations using weighted  
629 linkage disequilibrium.
- 630 15. Moorjani, P., Sankararaman, S., Fu, Q., Przeworski, M., Patterson, N., and Reich, D.  
631 (2016). A genetic method for dating ancient genomes provides a direct estimate of



- 632 human generation interval in the last 45,000 years. *Proceedings of the National*  
633 *Academy of Sciences of the United States of America* 113, 5652-5657.
- 634 16. Garanger, J. (1972). *Archéologie des Nouvelles-Hébrides*, (Paris: ORSTOM).
- 635 17. Xu, S., Pugach, I., Stoneking, M., Kayser, M., Jin, L., and Consortium, H.P.-A.S. (2012).  
636 Genetic dating indicates that the Asian-Papuan admixture through Eastern Indonesia  
637 corresponds to the Austronesian expansion. *Proceedings of the National Academy of*  
638 *Sciences of the United States of America* 109, 4574-4579.
- 639 18. Lipson, M., Loh, P.R., Patterson, N., Moorjani, P., Ko, Y.C., Stoneking, M., Berger, B., and  
640 Reich, D. (2014). Reconstructing Austronesian population history in Island Southeast  
641 Asia. *Nature communications* 5, 4689.
- 642 19. Spriggs, M. (1997). *The Island Melanesians*, (London: Routledge).
- 643 20. Valentin, F., Spriggs, M., Bedford, S., and Buckley, H. (2011). Vanuatu mortuary  
644 practices over three millennia: Lapita to the early contact period. *Journal of Pacific*  
645 *Archaeology* 2, 49-65.
- 646 21. Valentin, F., Shing, R., and Spriggs, M. (2005). Des restes humains datés du début de la  
647 période de Mangaasi (2400-1800 BP) découverts à Mangaliliu (Efate, Vanuatu).  
648 *Comptes Rendus Palévol* 4, 420-427.
- 649 22. Shutler, M.E., and Shutler, R. (1966). A preliminary report of archaeological  
650 explorations in the Southern New Hebrides. *Asian Perspectives* 9, 157-166.
- 651 23. Fu, Q., Hajdinjak, M., Moldovan, O.T., Constantin, S., Mallick, S., Skoglund, P., Patterson,  
652 N., Rohland, N., Lazaridis, I., Nickel, B., et al. (2015). An early modern human from  
653 Romania with a recent Neanderthal ancestor. *Nature* 524, 216-219.
- 654 24. Haak, W., Lazaridis, I., Patterson, N., Rohland, N., Mallick, S., Llamas, B., Brandt, G.,  
655 Nordenfelt, S., Harney, E., Stewardson, K., et al. (2015). Massive migration from the  
656 steppe was a source for Indo-European languages in Europe. *Nature* 522, 207-211.
- 657 25. Mathieson, I., Lazaridis, I., Rohland, N., Mallick, S., Patterson, N., Roodenberg, S.A.,  
658 Harney, E., Stewardson, K., Fernandes, D., Novak, M., et al. (2015). Genome-wide  
659 patterns of selection in 230 ancient Eurasians. *Nature* 528, 499-503.
- 660 26. Behar, D.M., van Oven, M., Rosset, S., Metspalu, M., Loogvali, E.L., Silva, N.M., Kivisild, T.,  
661 Torroni, A., and Villems, R. (2012). A "Copernican" reassessment of the human  
662 mitochondrial DNA tree from its root. *American journal of human genetics* 90, 675-684.
- 663 27. Li, H., and Durbin, R. (2010). Fast and accurate long-read alignment with Burrows-  
664 Wheeler transform. *Bioinformatics* 26, 589-595.
- 665 28. Weissensteiner, H., Pacher, D., Kloss-Brandstatter, A., Forer, L., Specht, G., Bandelt, H.J.,  
666 Kronenberg, F., Salas, A., and Schonherr, S. (2016). HaploGrep 2: mitochondrial  
667 haplogroup classification in the era of high-throughput sequencing. *Nucleic acids*  
668 *research* 44, W58-63.
- 669 29. Skoglund, P., Northoff, B.H., Shunkov, M.V., Derevianko, A.P., Paabo, S., Krause, J., and  
670 Jakobsson, M. (2014). Separating endogenous ancient DNA from modern day  
671 contamination in a Siberian Neandertal. *Proceedings of the National Academy of*  
672 *Sciences of the United States of America* 111, 2229-2234.
- 673 30. Patterson, N., Price, A.L., and Reich, D. (2006). Population structure and eigenanalysis.  
674 *PLoS genetics* 2, e190.
- 675 31. Galinsky, K.J., Bhatia, G., Loh, P.R., Georgiev, S., Mukherjee, S., Patterson, N.J., and Price,  
676 A.L. (2016). Fast Principal-Component Analysis Reveals Convergent Evolution of  
677 ADH1B in Europe and East Asia. *American journal of human genetics* 98, 456-472.

- 678 32. Patterson, N., Moorjani, P., Luo, Y., Mallick, S., Rohland, N., Zhan, Y., Genschoreck, T.,  
679 Webster, T., and Reich, D. (2012). Ancient admixture in human history. *Genetics* 192,  
680 1065-1093.  
681
